# Supplementary material
Source: publisher figshare collection journal article supplement (https://gsajournals.figshare.com/ndownloader/files/26881229)
Supplement: Supplementary file 1 [file 26881229]

## Sheet: Table_S2
Table S1: Peaks ands motif statistics
Dataset category	Figures	Target	Cell numbers	Library ID	Cycles	Peaks	Peaks with motif (p<0.0001)	Peaks without motif	Percentage of peaks with motif (p<0.0001)	Overlapped-hc peaks	Percentage of peaks that overlapped with hc peaks	Overlapped-hc peaks motif (p<0.0001)	Overlapped-hc peaks without motif	Percentage of overlapped-hc peaks with motif (p<0.0001)
Main	3, 4, S2	CTCF	50M	692	3	12352	12039	313	0.97	12261	0.99	11962	299	0.98
Main	3, 4, S2	CTCF	50M	693	5	14232	13844	388	0.97	14018	0.98	13640	378	0.97
Main	3, 4, S2	CTCF	50M	694	7	12915	12521	394	0.97	12660	0.98	12351	309	0.98
Main	3, 4, S2	CTCF	50M	695	10	17196	16658	538	0.97	16457	0.96	16008	449	0.97
Main	3, 4, S2	CTCF	50M	696	15	13519	13057	462	0.97	13003	0.96	12724	279	0.98
Main	3, 4, S2	CTCF	20M	732	3	13241	12849	392	0.97	12879	0.97	12594	285	0.98
Main	3, 4, S2	CTCF	20M	733	5	10655	10345	310	0.97	10408	0.98	10222	186	0.98
Main	3, 4, S2	CTCF	20M	734	7	12349	11962	387	0.97	11988	0.97	11740	248	0.98
Main	3, 4, S2	CTCF	20M	735	10	12595	12188	407	0.97	12102	0.96	11874	228	0.98
Main	3, 4, S2	CTCF	20M	736	15	7078	6748	330	0.97	6684	0.94	6612	72	0.99
ENCODE optimal IDR peaks	3, 4, S2	CTCF				28636	25984	2651	0.91
Main	3, 4, S2	TAL1	50M	670	3	291	97	194	0.33	94	0.32	90	4	0.96
Main	3, 4, S2	TAL1	50M	671	5	2751	1686	1065	0.61	1399	0.51	1170	229	0.84
Main	3, 4, S2	TAL1	50M	672	7	4474	2672	1802	0.6	1801	0.4	1497	304	0.83
Main	3, 4, S2	TAL1	50M	673	10	7868	4305	3563	0.55	2062	0.26	1701	361	0.82
Main	3, 4, S2	TAL1	50M	674	15	9052	4778	4274	0.53	2051	0.23	1709	342	0.83
Main	3, 4, S2	TAL1	20M	702	3	3899	2369	1530	0.61	1727	0.44	1429	298	0.83
Main	3, 4, S2	TAL1	20M	703	5	3936	2362	1574	0.6	1713	0.44	1428	285	0.83
Main	3, 4, S2	TAL1	20M	704	7	3529	2129	1400	0.6	1611	0.46	1358	253	0.84
Main	3, 4, S2	TAL1	20M	705	10	1726	977	749	0.57	888	0.51	790	98	0.89
Main	3, 4, S2	TAL1	20M	706	15	606	41	565	0.07	30	0.05	30	0	1
ENCODE optimal IDR peaks	3, 4, S2	TAL1				3334	1783	1550	0.53
